# Supplementary material
Source: publisher site journal article supplement (https://www.dovepress.com/article/366781)
Supplement: Supplementary file 1 [file get_supplementary_file.php]

**Appendix 1: Interview Guide**

**Introduction:**

I am interested in hearing your experience with managing your osteoporosis. I am interested in learning how we can improve your osteoporosis care through exercise, nutrition, and falls prevention. There has been a lot of literature on improving osteoporosis through medication, and recently more literature on the benefits of exercise. We are now interested in hearing what you have heard about the benefits of exercise related to your osteoporosis, and if you have been given any advice on exercise, nutrition, or falls prevention.

I will be asking you a series of questions related to your experience with osteoporosis and what advice you have received related to exercise, nutrition and falls prevention. If there are any questions you do not wish to answer we can skip them. The interview will be audio recorded and transcribed, however, you will not be identified. The interview should take approximately 45 minutes.

**Pt. 1: Osteoporosis Care:**

1. Which medical professionals have you discussed your osteoporosis care with?
2. What was your experience with getting information from those people? (what’s the problem with the information you’re getting)
   1. Did you find that the information you received was useful?
   2. What did you discuss?
   3. Did you get the information you needed?
3. Have you ever had an osteoporotic fracture?
   1. Have you had more than one?
4. Do you wish there was something anyone told you after that first fracture? After any subsequent fractures?
5. Can you describe the treatment you’ve received for your osteoporosis?

**Pt. 2: Non-pharmacological advice**

1. What recommendations have you been given to manage your osteoporosis Prompt: Have you looked at any resources to try to get your questions answered?
   1. Any specific resources?
   2. Websites?
   3. Have you started following that advice?
   4. Who gave you that advice?
2. Has anyone given you any advice on how to manage your osteoporosis?
   1. Specifically related to exercise
   2. nutrition and
      1. what foods are good for your bones
      2. give examples of foods that are bad for your bones
   3. preventing falls
   4. Have you followed up that advice?
3. What advice did you receive related to exercise?
   1. Nutrition?
   2. And falls prevention for managing your osteoporosis?

**Pt. 3: Expectations of non-pharmacological care**

1. What are your expectations of joining an exercise class?
2. What do you think the benefits of exercise are?
3. What are the dangers associated with exercise?
4. What might make it difficult for you to participate in exercise? How do you think you can overcome those difficulties?
5. Do you think you need to change your diet as a result of your osteoporosis? How?
6. Are you concerned about falling?
   1. Have you fallen recently?
      1. What things do you think might have contributed to your fall?
   2. What might some risk factors to falling be? (do you think you will break a bone?)
   3. What do you think you need to watch out for in your home, in your neighbourhood, at work? Prompt: Give some examples, Tell me more about that
   4. Do you think your osteoporosis puts you at a higher risk of falling? Why? Have you had a bone scan? Do you know what your findings are and what that means?
   5. What would help you prevent falls?

**Pt. 4: Goals and Knowledge**

1. What are your long-term physical goals?
   1. Do you think osteoporosis limits that?
   2. What would you need to overcome those limitations?
2. If you had to estimate your future risk of fracture, what do you think that would be?
3. Do you feel that you are lacking knowledge related to your osteoporosis care?
   1. Specifically related to exercise, nutrition and falls?
4. How would you prefer to get that information?
   1. Classes
   2. Online
